# Supplementary material for: Large-Area Oxidized Phosphorene Nanoflakes Obtained by Electrospray for Energy-Harvesting Applications
Source: PubMed Central journal article supplement (PMC9301623; doi:10.1021/acsanm.0c03465), 2021-03-29
Supplement: an0c03465_si_001.pdf [file an0c03465_si_001.pdf]

## Supporting Information

# Large-Area Oxidized Phosphorene Nanoflakes Obtained by Electrospray for Energy-Harvesting Applications

*Salvatore Moschetto,\* † Margherita Bolognesi, † Federico Prescimone, † Marco Brucale, †  
Alessio Mezzi, § Luca Ortolani, ‖ Maria Caporali, ⊥ Pasqualantonio Pingue, # Manuel Serrano-  
Ruiz, ⊥ Dario Pisignano, #, ‡ Maurizio Peruzzini, ⊥ Luana Persano, \*, # Stefano Toffanin\*, †.*

†Istituto per lo Studio dei Materiali Nanostrutturati (ISMN) - Consiglio Nazionale delle Ricerche  
(CNR), Via P. Gobetti 101, 40129 Bologna, Italy

§Istituto per lo Studio dei Materiali Nanostrutturati (ISMN) - Consiglio Nazionale delle Ricerche  
(CNR), P.O. Box 10, I-00016 Monterotondo Scalo, Rome, Italy

‖Istituto per la microelettronica e microsistemi (IMM) - Consiglio Nazionale delle Ricerche  
(CNR), Via P. Gobetti 101, 40129 Bologna, Italy

⊥Istituto di Chimica dei Composti Organometallici (ICCOM) - Consiglio Nazionale delle  
Ricerche (CNR), Via Madonna del Piano 10, 50019 Sesto Fiorentino, Florence, Italy

# Laboratorio NEST, Scuola Normale Superiore and Istituto Nanoscienze - Consiglio Nazionale delle Ricerche (CNR), Piazza San Silvestro 12, I-56127 Pisa, Italy

‡Dipartimento di Fisica, Università di Pisa, Largo B. Pontecorvo 3, I-56127 Pisa, Italy

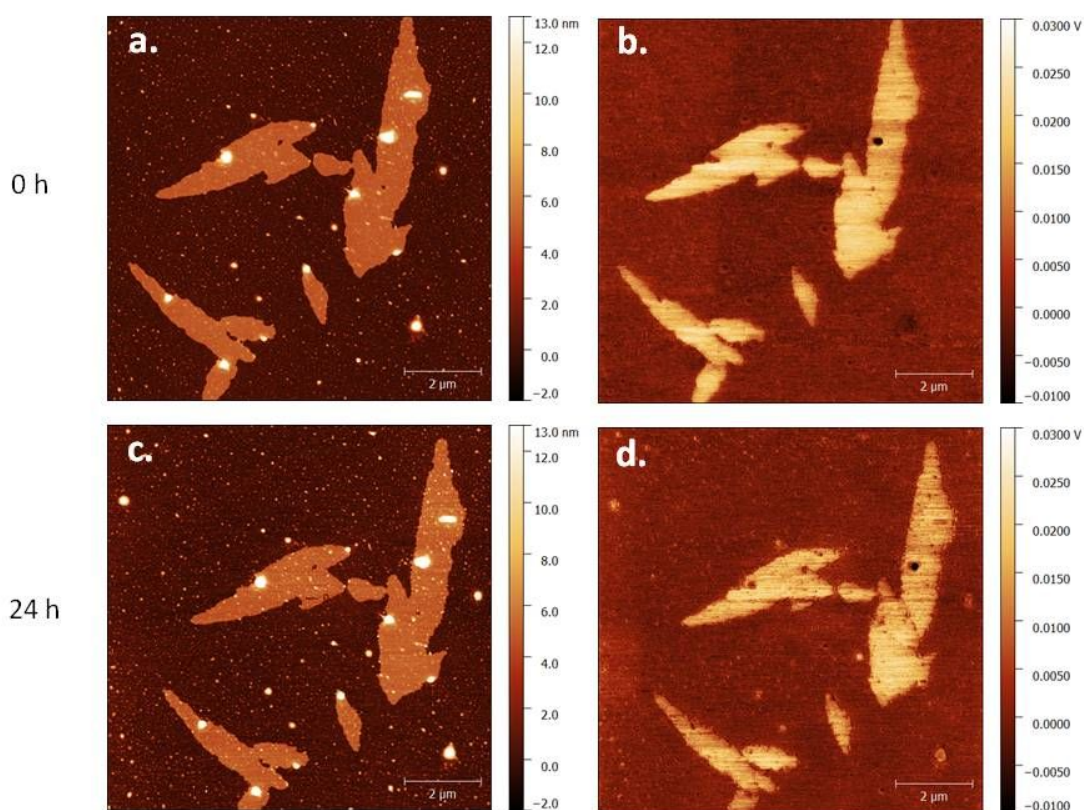

**Figure S1.** AFM height (a, c) and phase (b, d) images of the same  $\text{PO}_x$  flakes, immediately after deposition (a, b) and after 24 hours of exposure (b, d) to standard laboratory conditions (approximately 50% humidity and 400 lux of illumination). Both height and phase of investigated monolayer flakes remain unchanged by air exposure, not showing the typical

oxidation features appearing as bubble-like protrusions over bare phosphorene flakes after air exposure<sup>1</sup>. These results confirm the high chemical stability of the PO<sub>x</sub>.

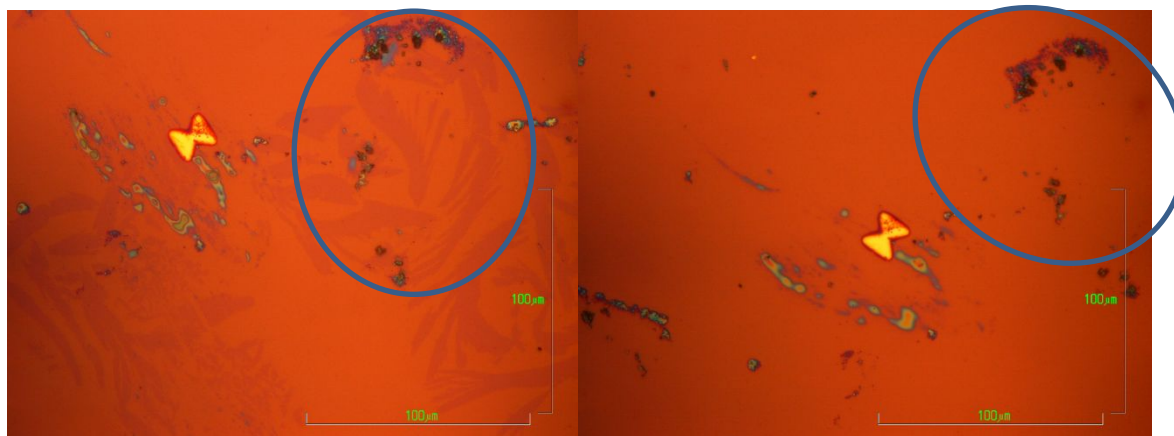

**Figure S2.** Optical images on the left and on the right show respectively the PO<sub>x</sub> flakes before and after the annealing process (400°C, 15 minutes).

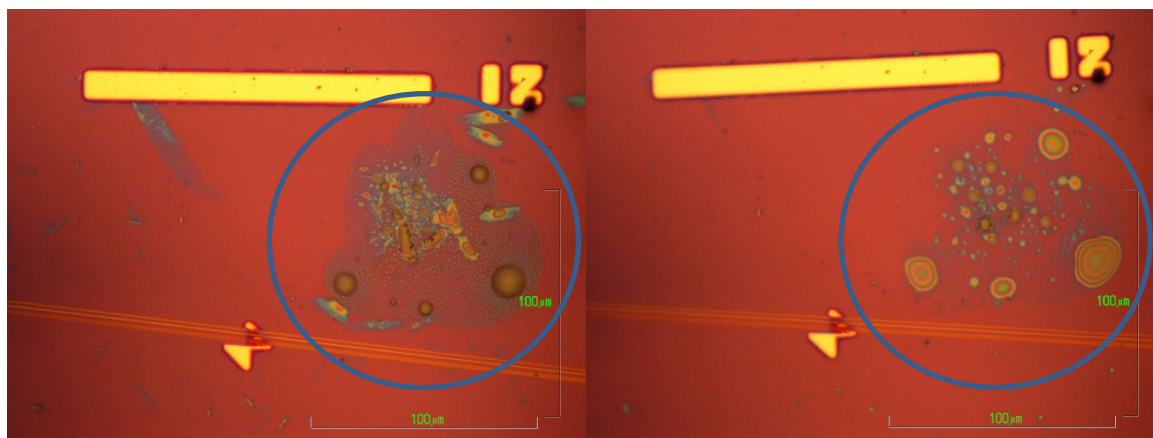

**Figure S3.** The optical images on the left and on the right show respectively the PO<sub>x</sub> flakes before and after the annealing process (200°C, 15 minutes).

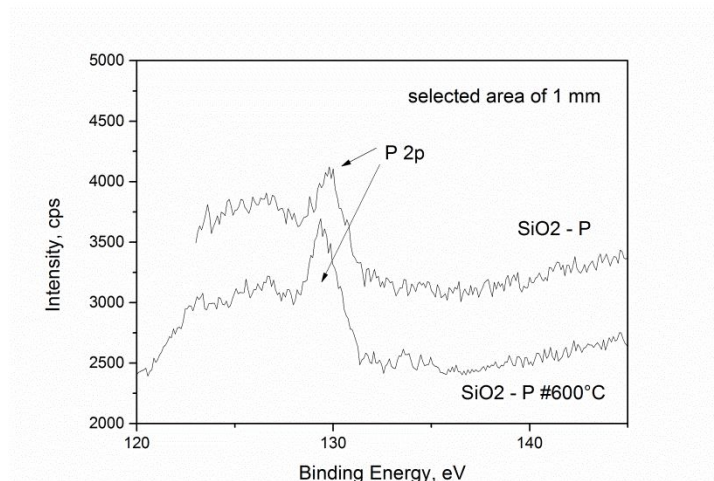

**Figure S4.** XPS spectra of 2D bP on SiO<sub>2</sub> substrate before and after annealing (600° C, 1 hour).

**Table S1.** Binding Energy (BE) and atomic concentration (atomic %), acquired in two different point of the 2D bP flakes on Si/SiO<sub>2</sub> substrate.

| Signal  | Peak BE (eV) | Atomic % | Bond             |
|---------|--------------|----------|------------------|
| C1s – 1 | 285.0        | 6.0      | C – C            |
| O1s     | 533.1        | 58.0     | SiO <sub>2</sub> |
| P2p     | 129.9        | 0.5      | Phosphorene      |
| Si2p3   | 103.6        | 33.0     | SiO <sub>2</sub> |

| Signal | Peak BE (eV) | Atomic % | Bond             |
|--------|--------------|----------|------------------|
| C1s    | 285.0        | 2.5      | C – C            |
| O1s    | 533.1        | 61.9     | SiO <sub>2</sub> |
| P2p    | 129.4        | 0.6      | Phosphorene      |
| Si2p3  | 103.4        | 35.1     | SiO <sub>2</sub> |

**Table S2.** XPS signals of P, C, O, N and Si revealed on the electro-sprayed P<sub>2</sub>O<sub>5</sub> flakes.

|                          |            | <b>C1s (C - C)</b> | <b>C1s (C - O)</b> |                 |                            | <b>O1s</b>            | <b>P2p<sub>3/2</sub><br/>(P - P)</b> |                                            |
|--------------------------|------------|--------------------|--------------------|-----------------|----------------------------|-----------------------|--------------------------------------|--------------------------------------------|
| <b>Bulk bP</b>           | BE<br>(eV) | 284.7              | 287.2              |                 |                            | 532.5                 | 130.0                                |                                            |
|                          | At. %      | 40.1               | 11.1               |                 |                            | 5.6                   | 43.3                                 |                                            |
|                          |            | C1s (C - C)        | C1s (C - O)        | C1s (-<br>COOH) | O1s<br>(SiO <sub>2</sub> ) |                       | P2p <sub>3/2</sub><br>(P - P)        | Si2p <sub>3/2</sub><br>(SiO <sub>2</sub> ) |
| <b>exfoliated<br/>bP</b> | BE<br>(eV) | 285.0              | 286.9              | 289.0           | 533.1                      |                       | 130.0                                | 103.6                                      |
|                          | At. %      | 6                  | 1.6                | 1.0             | 58.0                       |                       | 0.5                                  | 33.0                                       |
|                          |            | C1s (C - C)        | C1s (C - O)        | N1s (NO)        | O1s<br>(SiO <sub>2</sub> ) | O1s (P -<br>O, C - O) | P2p <sub>3/2</sub><br>(P - O)        | Si2p <sub>3/2</sub><br>(SiO <sub>2</sub> ) |
| <b>PO<sub>x</sub></b>    | BE<br>(eV) | 285.0              | 286.6              | 402.4           | 533.1                      | 531.2                 | 134.3                                | 103.6                                      |
|                          | At. %      | 14.8               | 1.6                | 3.3             | 52.1                       | 3.6                   | 2.0                                  | 22.6                                       |

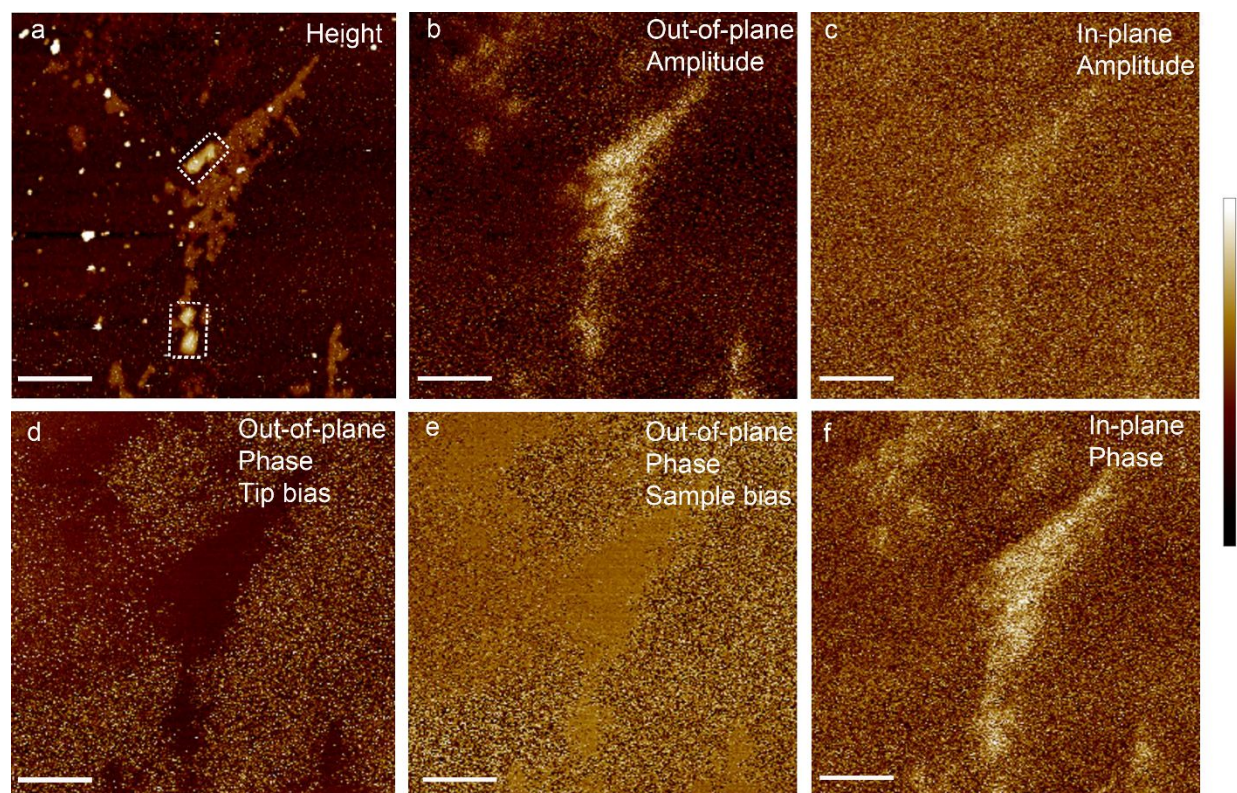

**Figure S5.** Piezoforce microscopy (PFM) micrographs of  $P_2O_5$  flakes. a) Height image, vertical scale: -8 nm-20 nm. b) Piezoresponse out-of-plane amplitude, vertical scale -20-40pm. c) Piezoresponse in-plane amplitude, vertical scale 7-11 pm. d-e) Piezoresponse out-of-plane phase shift. In d (e) a voltage bias is applied to the tip (sample). f) Piezoresponse in-plane phase image. Scale bars: 1  $\mu$ m.

(1) Bolognesi, M.; Brucale, M.; Lorenzoni, A.; Prescimone, F.; Moschetto, S.; Korolkov, V. V.; Baldoni, M.; Serrano-Ruiz, M.; Caporali, M.; Mercuri, F.; Besley, E.; Muccini, M.; Peruzzini, M.; Beton, P. H.; Toffanin, S. Epitaxial Multilayers of Alkanes on Two-Dimensional Black Phosphorus as Passivating and Electrically Insulating Nanostructures. *Nanoscale* **2019**, *11* (37), 17252–17261.

**Corresponding Authors:**

\*E-mail: [stefano.toffanin@cnr.it](mailto:stefano.toffanin@cnr.it)

\*E-mail: [luana.persano@nano.cnr.it](mailto:luana.persano@nano.cnr.it)

\*E-mail: [salvatore.moschetto@ismn.cnr.it](mailto:salvatore.moschetto@ismn.cnr.it)
